# Supplementary material for: Comparing alchemical and physical pathway methods for computing the absolute binding free energy of charged ligands
Source: Royal Society of Chemistry journal article supplement (doi:10.1039/c8cp01524d), 2018-01-01
Supplement: c8cp01524d1.pdf [file c8cp01524d1.pdf]

# Supporting Information for “Comparing Alchemical and Physical Pathway Methods for Computing the Absolute Binding Free Energy of Charged Ligands”

5/10/2018

*Nanjie Deng,<sup>1\*</sup> Di Cui,<sup>2</sup> Bin W. Zhang,<sup>2</sup> Junchao Xia,<sup>2</sup> Jeffrey Cruz,<sup>1</sup> Ronald Levy<sup>2</sup>*

(1) Department of Chemistry and Physical Sciences, Pace University, New York, NY 10038

(2) Center for Biophysics and Computational Biology, Temple University, Philadelphia, PA

19102

Email: [nanjie.deng@gmail.com](mailto:nanjie.deng@gmail.com)

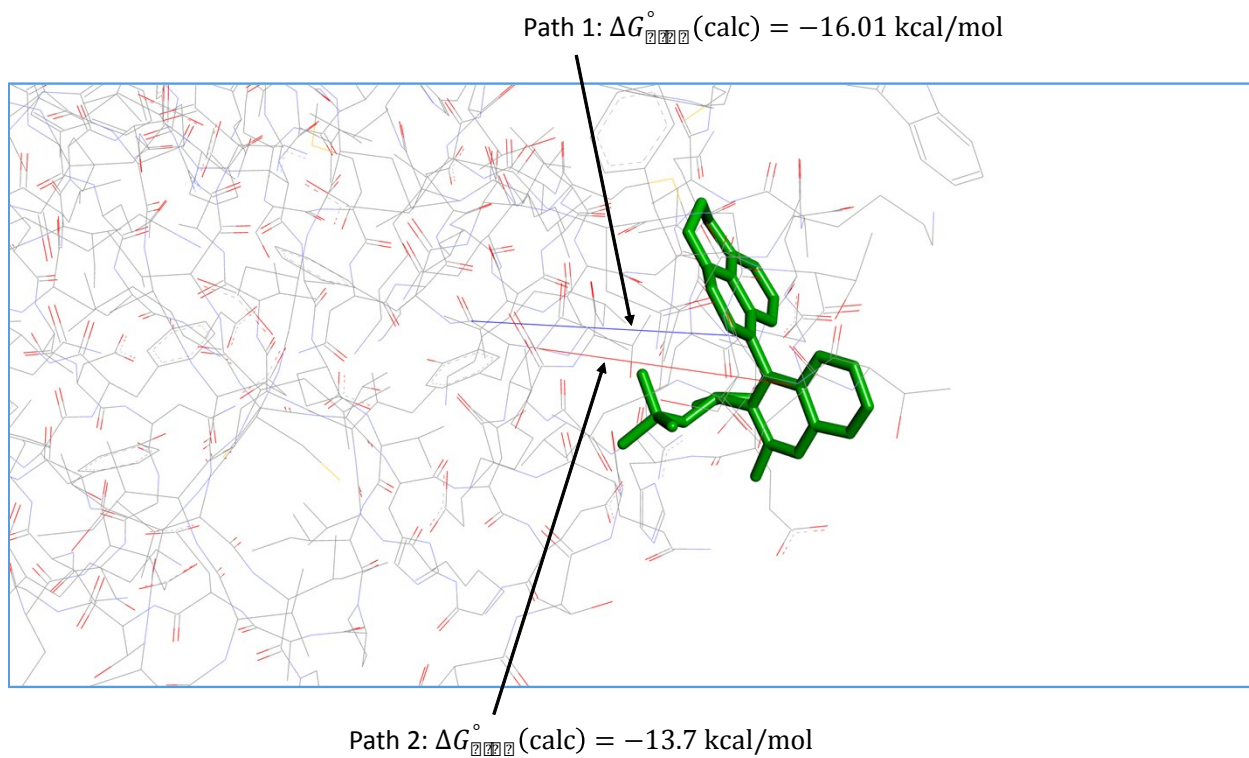

Figure S1. Two low free energy paths used in the PMF calculation of the absolute binding free energy for BI-224436.

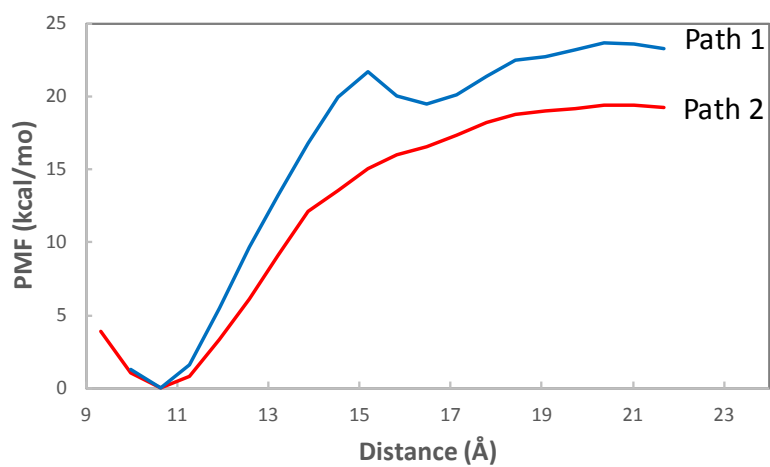

Figure S2. The PMF profiles of the two paths used in the PMF calculation for BI-224436. The error bars in the PMF are omitted for clarity.

Table S1. Meanings of the symbols used in the equations

| Symbol                                        | Meaning of the symbol                                                                                                                                                                                                                                                                                                                              |
|-----------------------------------------------|----------------------------------------------------------------------------------------------------------------------------------------------------------------------------------------------------------------------------------------------------------------------------------------------------------------------------------------------------|
| $Z_{RL,N}$                                    | A system containing one receptor(R)-ligand(L) complex in the complexed state solvated by N water molecules.                                                                                                                                                                                                                                        |
| $Z_{0,N}$                                     | A system containing N solvent molecules.                                                                                                                                                                                                                                                                                                           |
| $Z_{R,N}$                                     | A system containing one receptor R solvated by N water molecules.                                                                                                                                                                                                                                                                                  |
| $Z_{L,N}$                                     | A system containing one ligand L solvated by N water molecules.                                                                                                                                                                                                                                                                                    |
| $Z_{RL,N}^{V_{site}}$                         | Same as $Z_{RL,N}$ , except that the complexed state is defined by those configurations in which the ligand is inside the predefined binding site volume $V_{site}$ enforced by the step function $I(\xi)$ , which is implemented by a flat-bottom potential.                                                                                      |
| $Z_{R\cdots L,N}^{V_{site}}$                  | A solvated ligand-receptor complex, in which the ligand is coupled with the receptor and solvent, and restrained by the harmonic potential $U_{restr}(\xi)$ and the step function $I(\xi)$ .                                                                                                                                                       |
| $Z_{R,N\cdots L}^{V_{site}gas}$               | A receptor-ligand complex in which the ligand is restrained by both $I(\xi)$ and $U_{restr}(\xi)$ but its nonbonded interactions with its environment, i.e. receptor plus solvent, are turned off.                                                                                                                                                 |
| $Z_{R,N+L}^{V_{site}gas}$                     | A receptor-ligand complex in which the ligand is not interacting with its environment but is confined to the binding site $V_{site}$ only by the step function $I(\xi)$ .                                                                                                                                                                          |
| $Z_{RL(\theta,\phi,\Theta,\Phi,\Psi),N}$      | A solvated complex RL in which ligand L's external degrees of freedom, which are defined by the polar angles ( $\theta$ , $\phi$ ) and three Euler angles ( $\Theta$ , $\Phi$ , $\Psi$ ), are restrained to their equilibrium values in the bound state by a set of harmonic restraints $(U_{\theta}, U_{\phi}, U_{\Theta}, U_{\Phi}, U_{\Psi})$ . |
| $Z_{R+L(r^*,\theta,\phi,\Theta,\Phi,\Psi),N}$ | A solvated system containing R and L in which L is not only subject to the polar and orientational restraints $(U_{\theta}, U_{\phi}, U_{\Theta}, U_{\Phi}, U_{\Psi})$ , but is also subject to the harmonic restraint $U_{r^*} = \frac{1}{2}k_r(r - r^*)^2$ , which forces the ligand atom A to be close to a bulk location $r^*$ .               |
| $Z_{P+L,N}$                                   | A system containing the receptor R, an unbound L, and N solvent molecules.                                                                                                                                                                                                                                                                         |
